# Supplementary material for: Proteomics, Phosphoproteomics and Mirna Analysis of Circulating Extracellular Vesicles through Automated and High-Throughput Isolation
Source: MDPI journal article supplement (doi:10.3390/cells11132070), 2022-06-29
Supplement: s1 [file s1]

# **Proteomics, phosphoproteomics and miRNA analysis of circulating extracellular vesicles through automated and high-throughput isolation**

Hao Zhang<sup>1,2#</sup>, Yu-han Cai<sup>1#</sup>, Yajie Ding<sup>1</sup>, Guiyuan Zhang<sup>1,3</sup>, Yufeng Liu<sup>1,3</sup>, Jie Sun<sup>1</sup>, Dong Wei<sup>1</sup>, Yuchen Yang<sup>4</sup>, Zhen Zhan<sup>1</sup>, Anton Iliuk<sup>5</sup>, Zhongze Gu<sup>1</sup>, Yanhong Gu<sup>4</sup>, W. Andy Tao<sup>5,6\*</sup>

## **Supplementary Material**

### **SUPPLEMENTARY FIGURE CAPTION**

Figure S1 Optimization of automatic extraction instrument. A. the magnetic beads dosage. B. Incubation time. C. Washing time. D. Elution speed.

Figure S2 RPS (Range 150 nm-500 nm) characterization of EVs isolated by the three methods.

Figure S3 Intersection of exosome proteomics results with different capture methods and TOP100 protein in ExoCarta database

Figure S4 Workflow of EV miRNA analyses of urine samples from patients with prostatitis or prostatesis (Control) and prostate cancer.

Figure S5 PCA (Principal Components Analysis) of EV protein (Left) and phosphorylated protein (Right).

Figure S6 GO analysis of EV differential proteins.

Figure S7 KEGG analysis of EV differential proteins.

Figure S8 Other potential biomarkers of urinary exosomes in prostate cancer

Figure S9 Comparison of miR-125b/miR-145 results in urine exosomes between control and prostate cancer groups

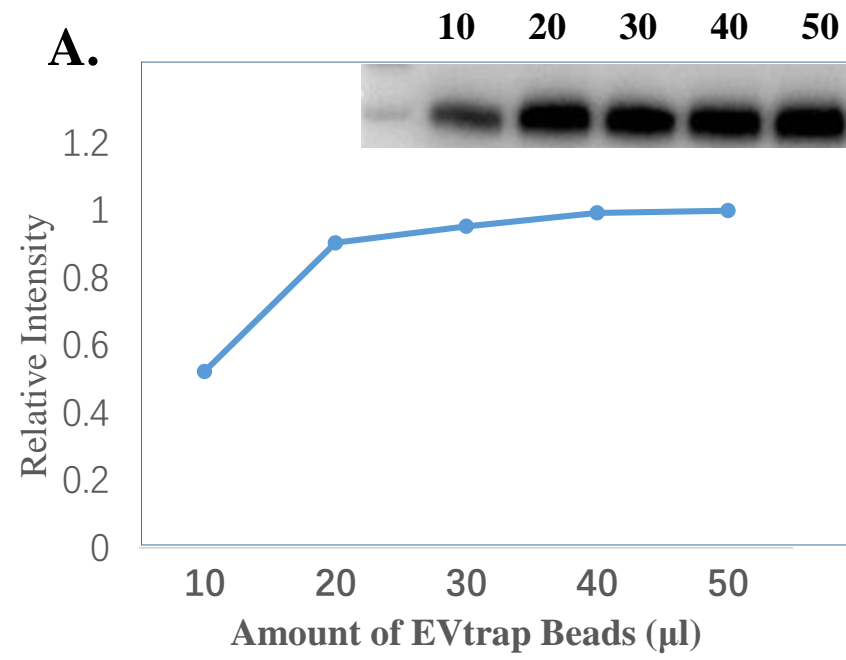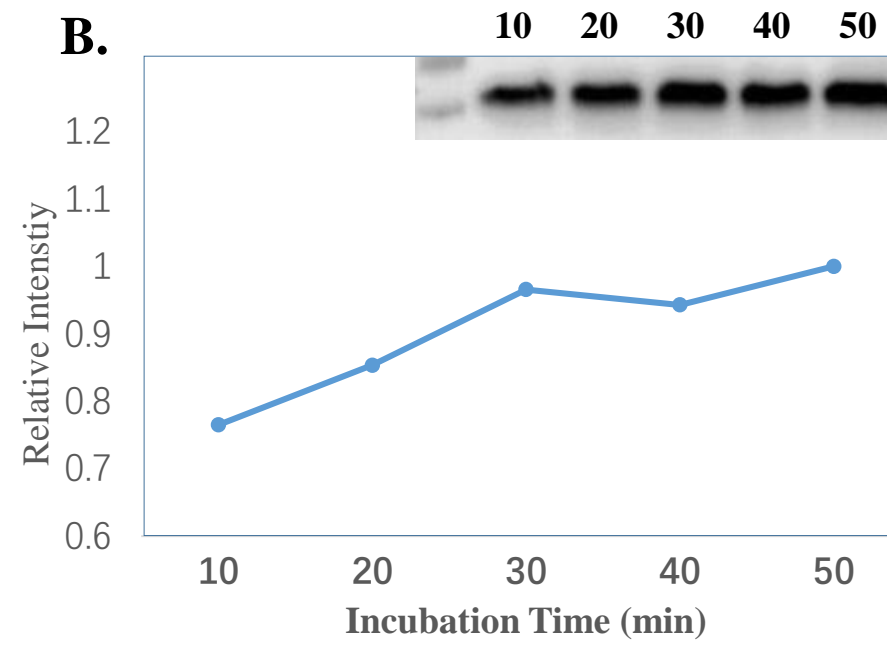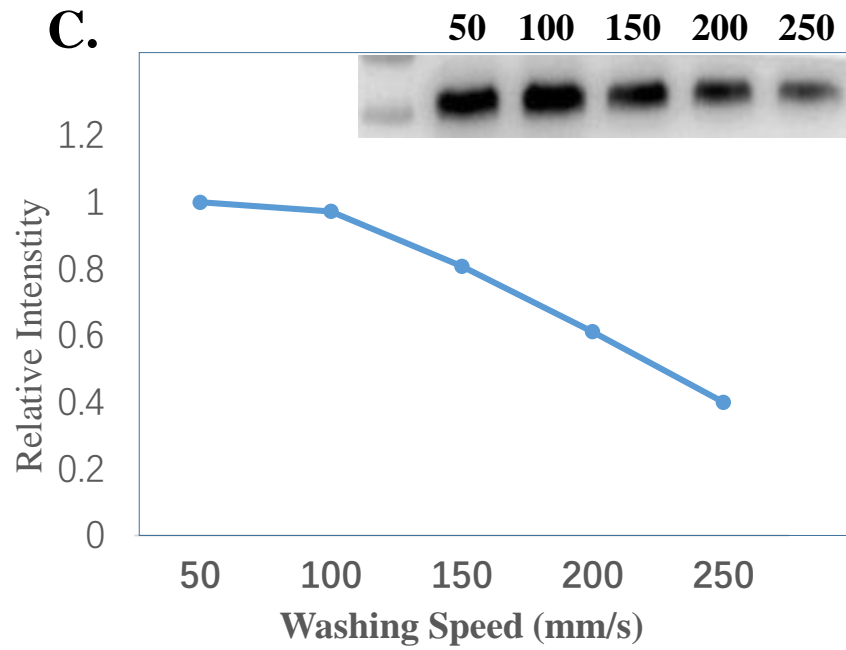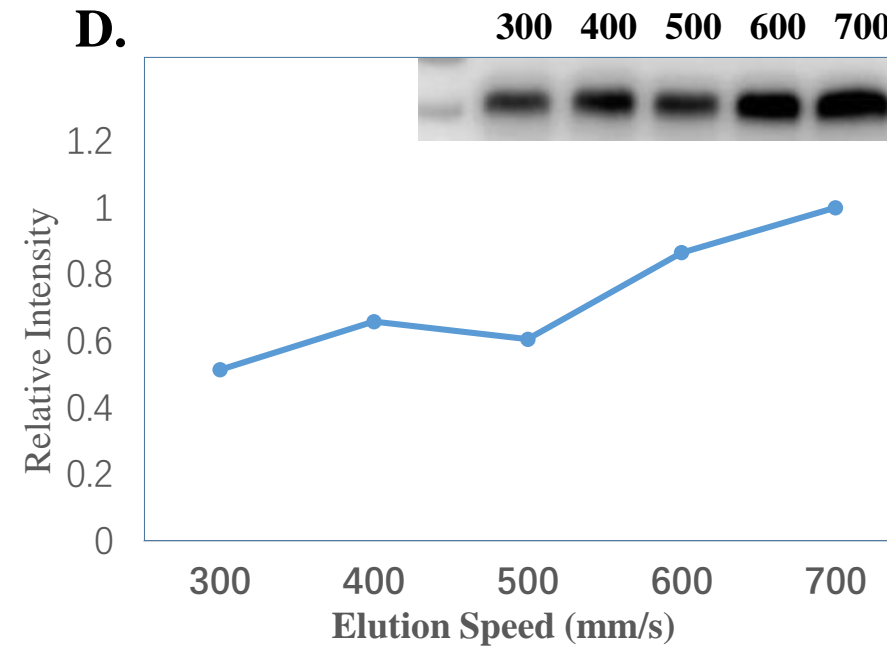

Figure S1

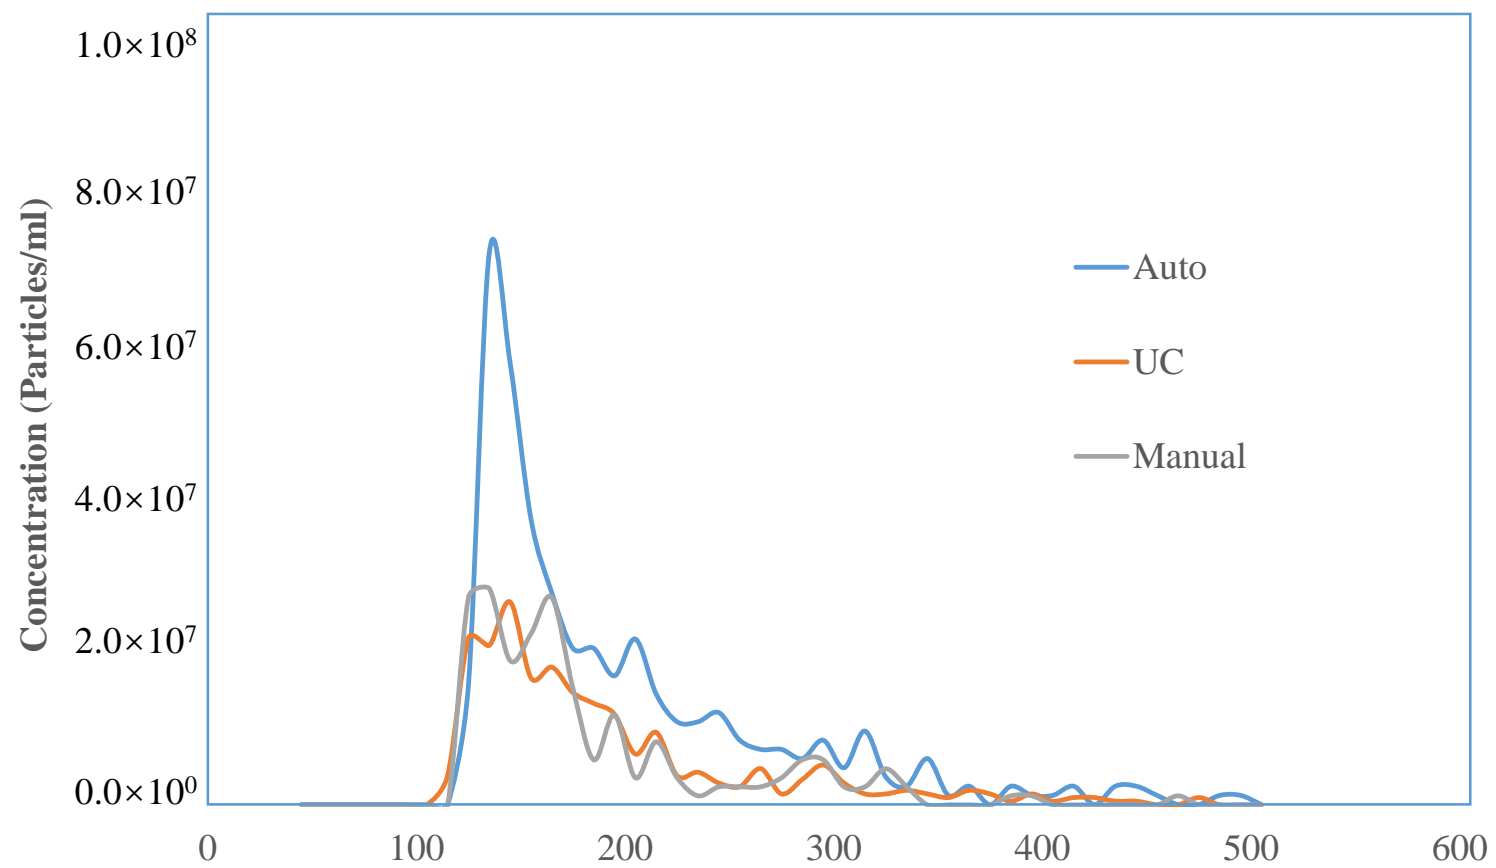

Figure S2

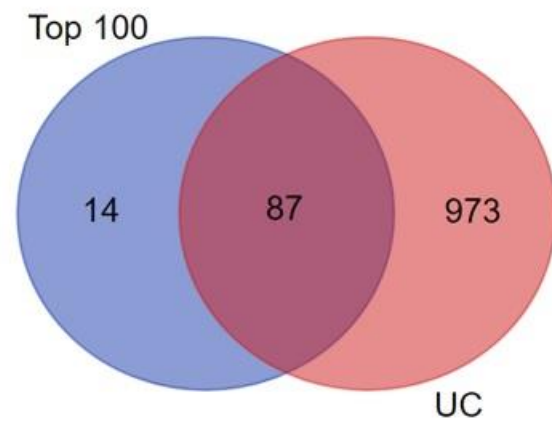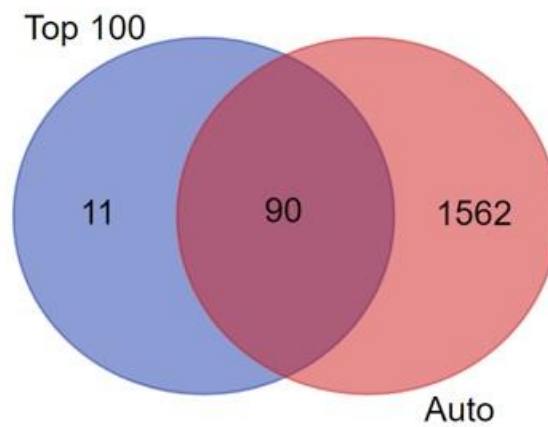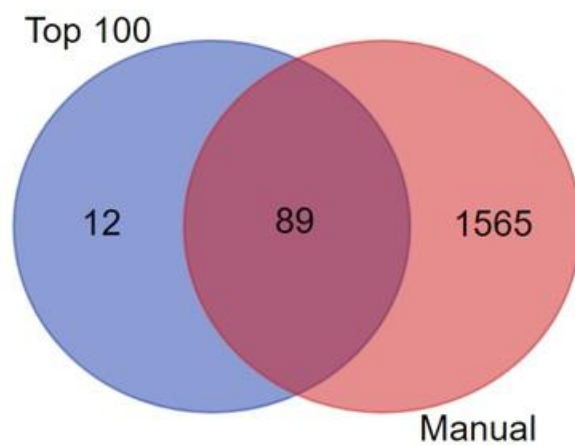

Figure S3

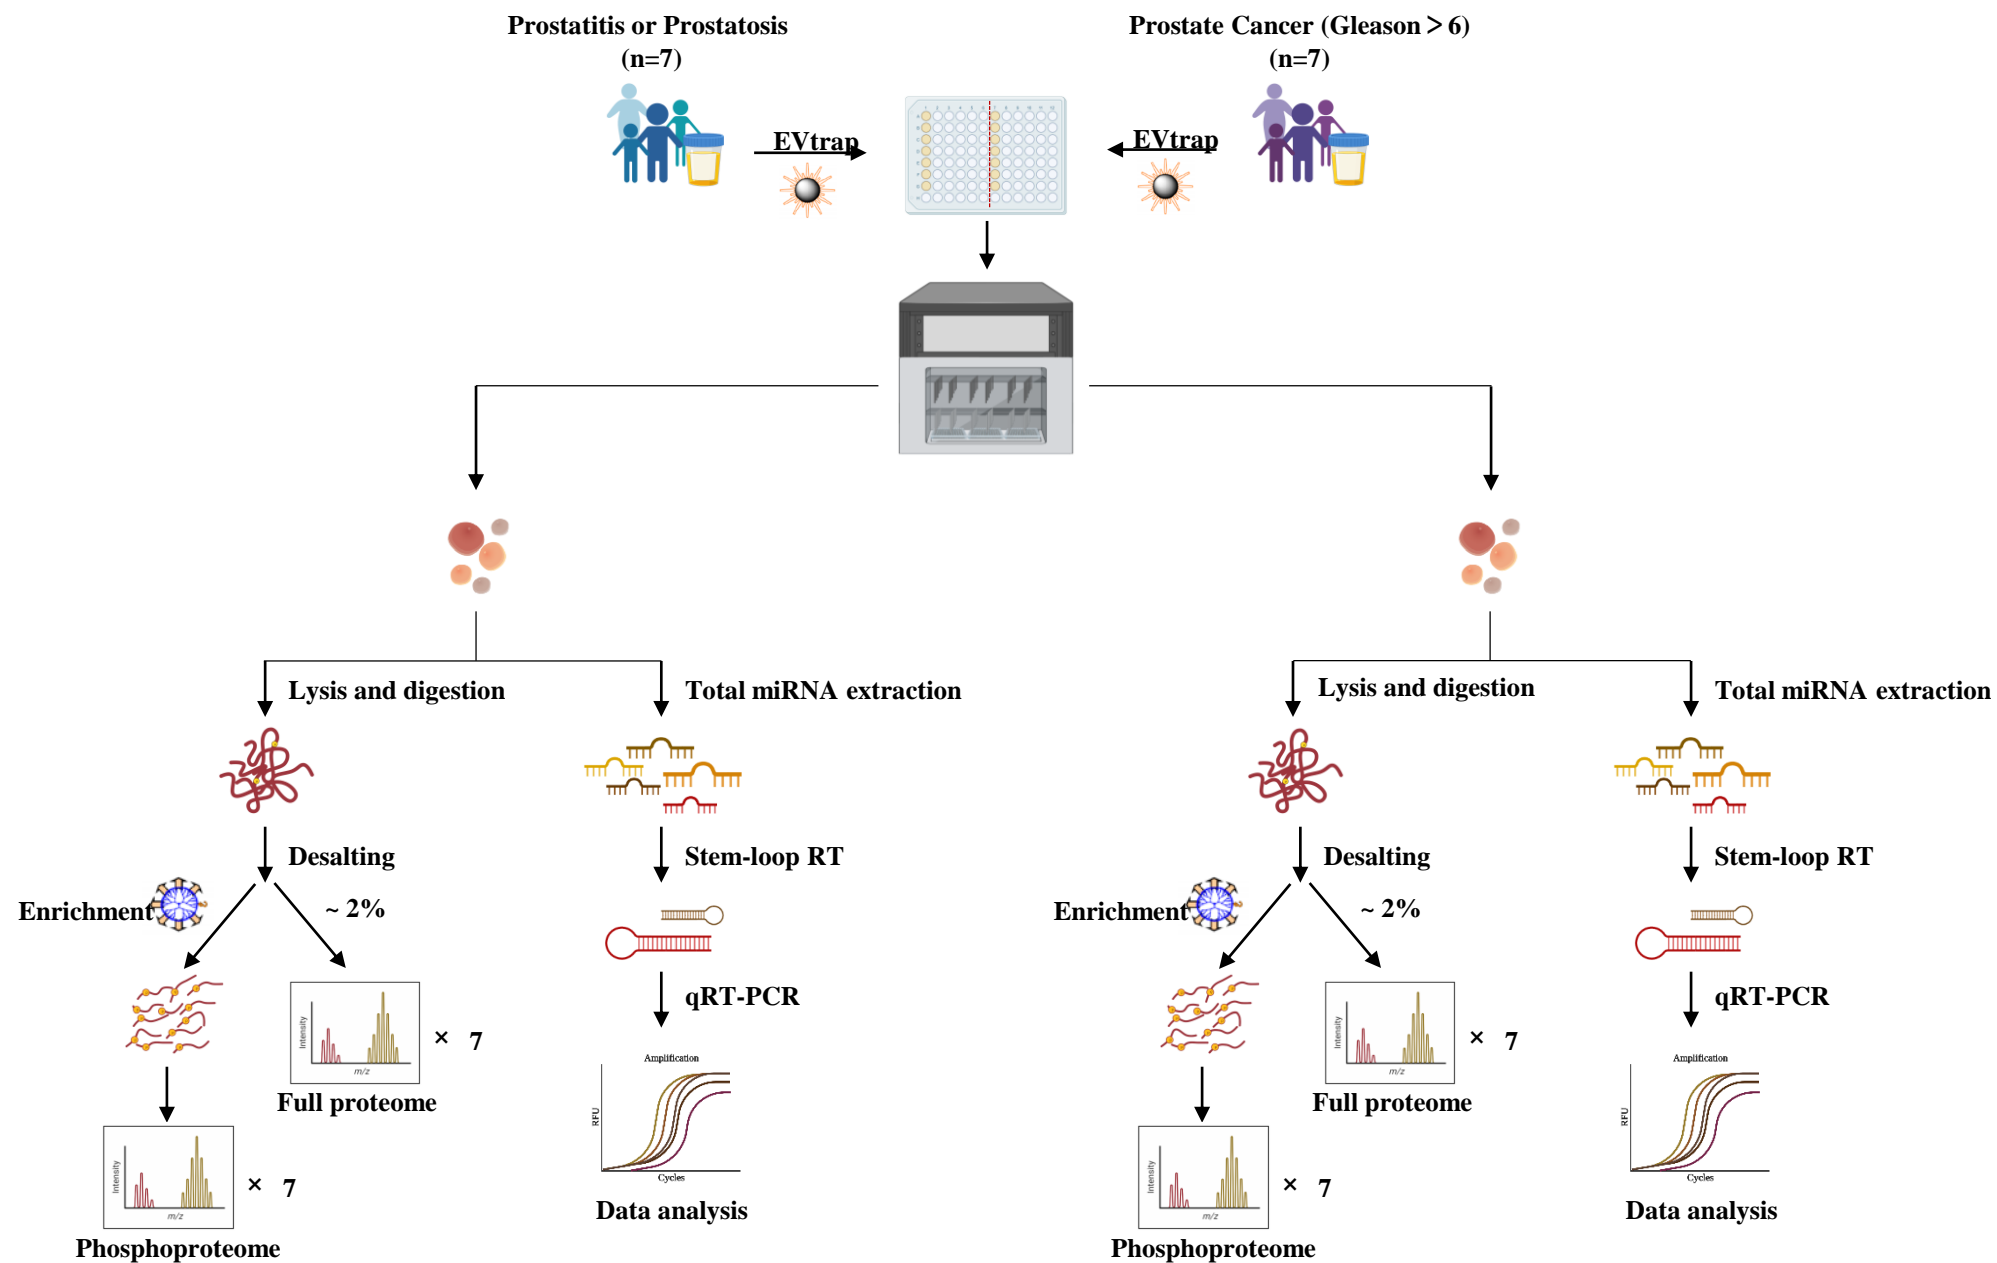

Figure S4

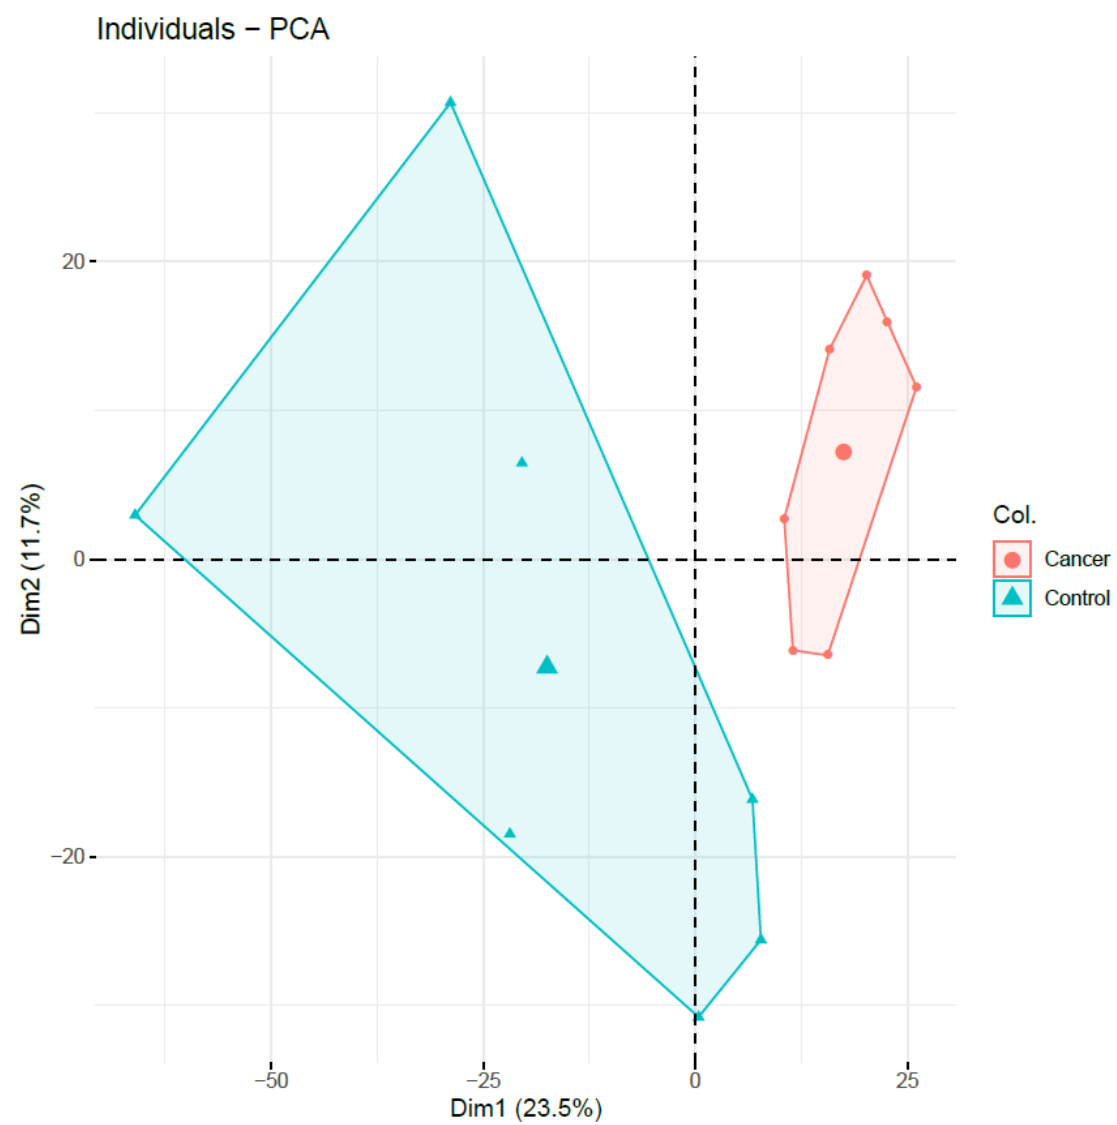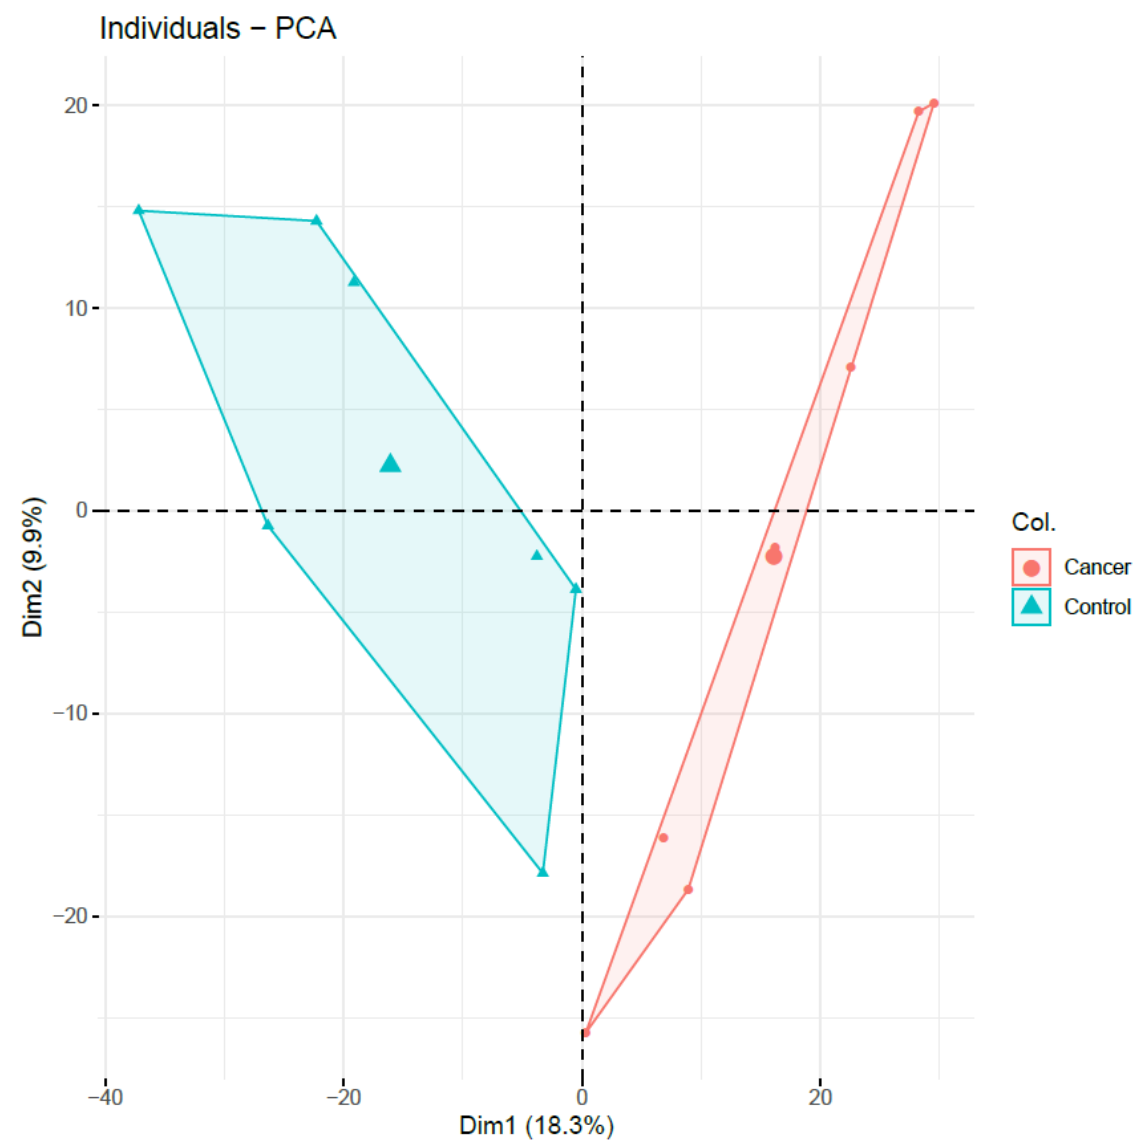

Figure S5

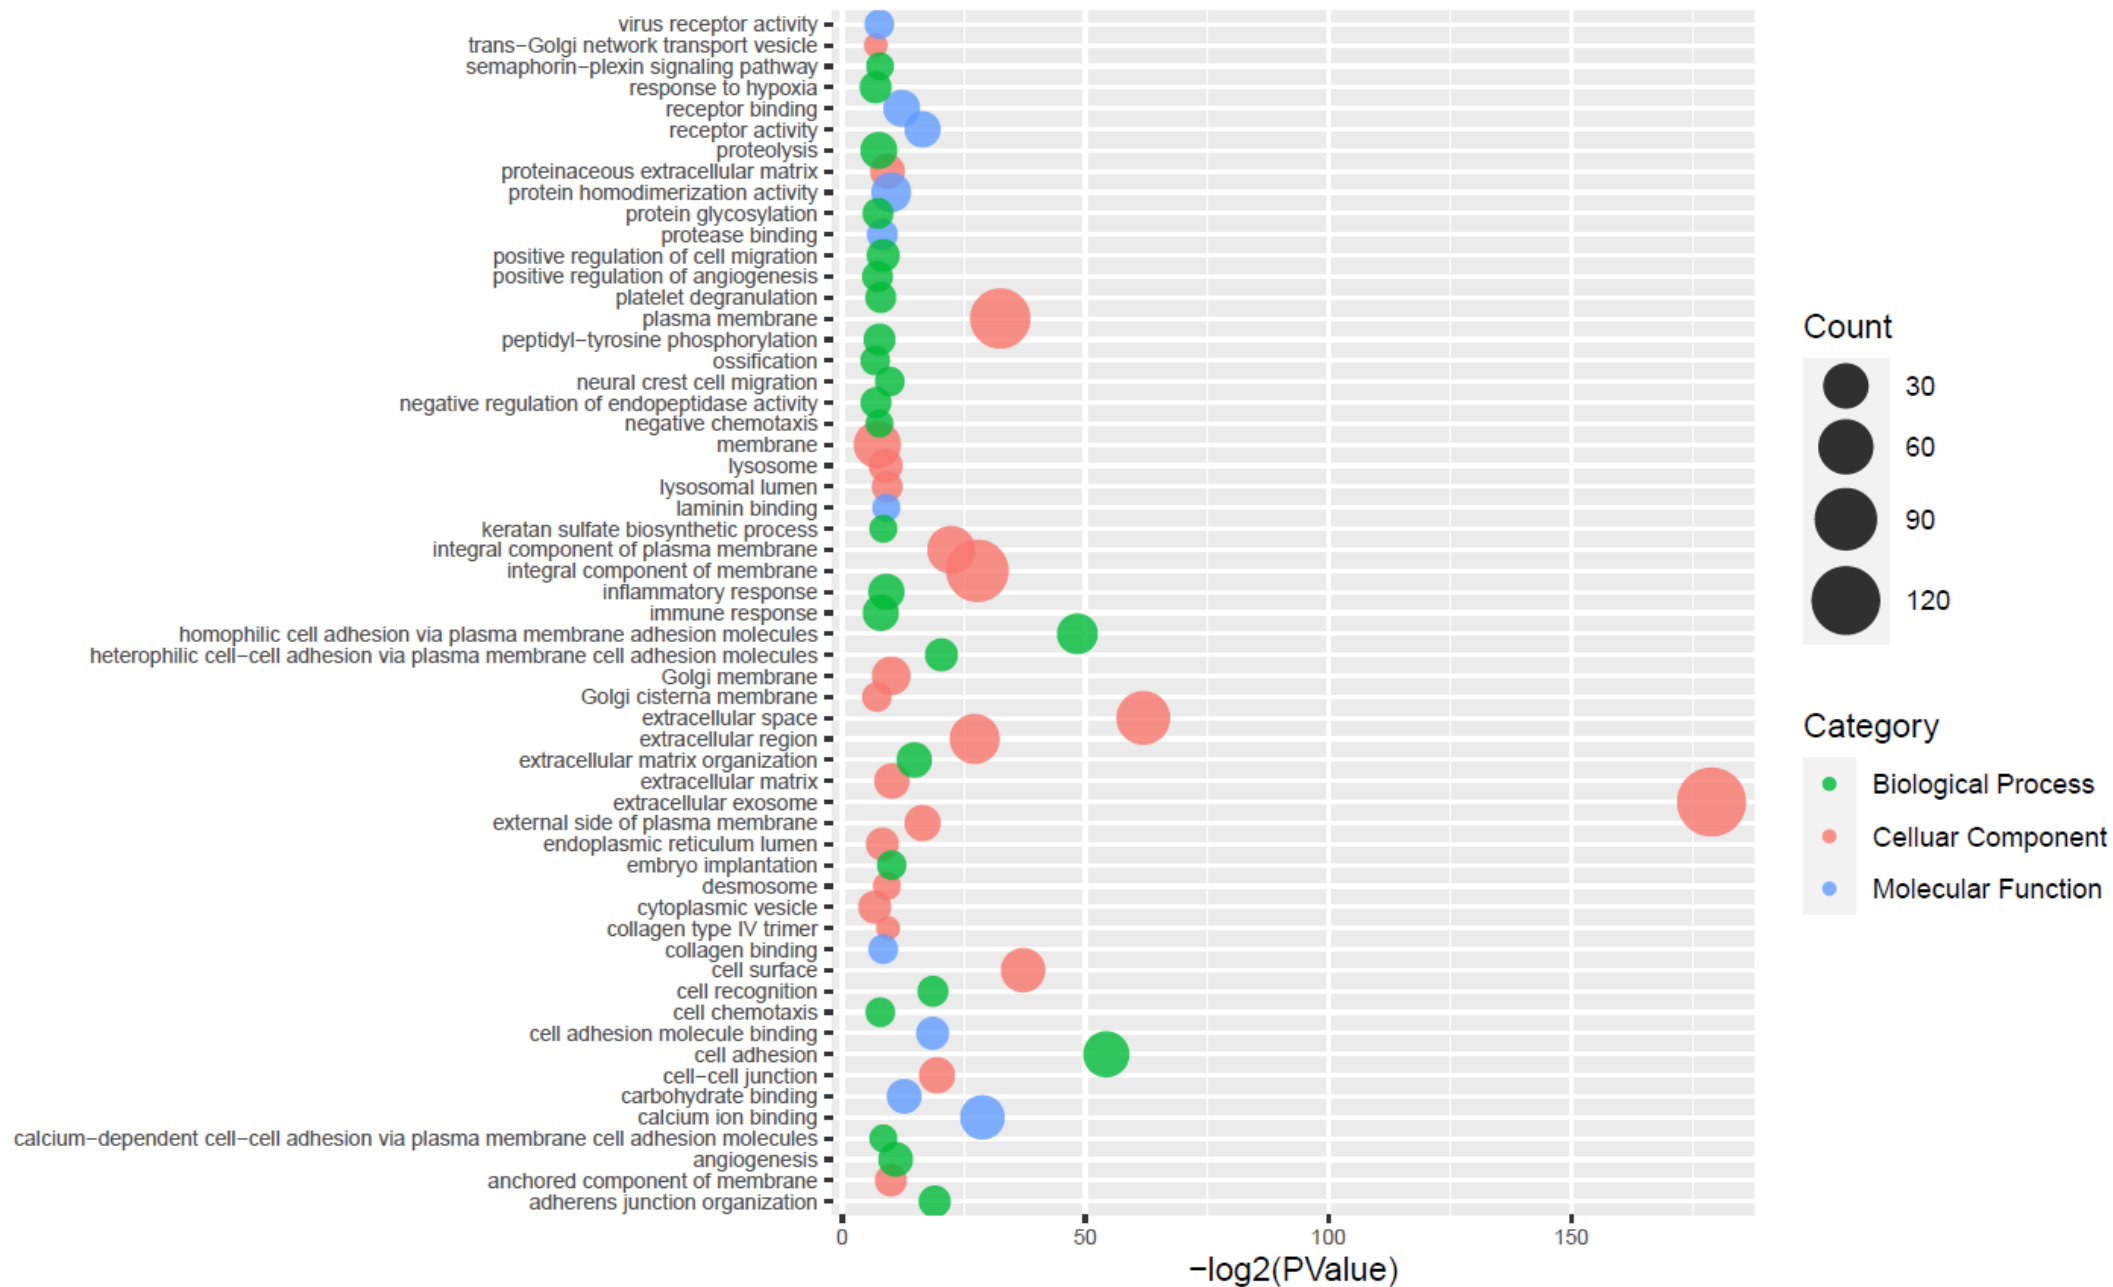

Figure S6

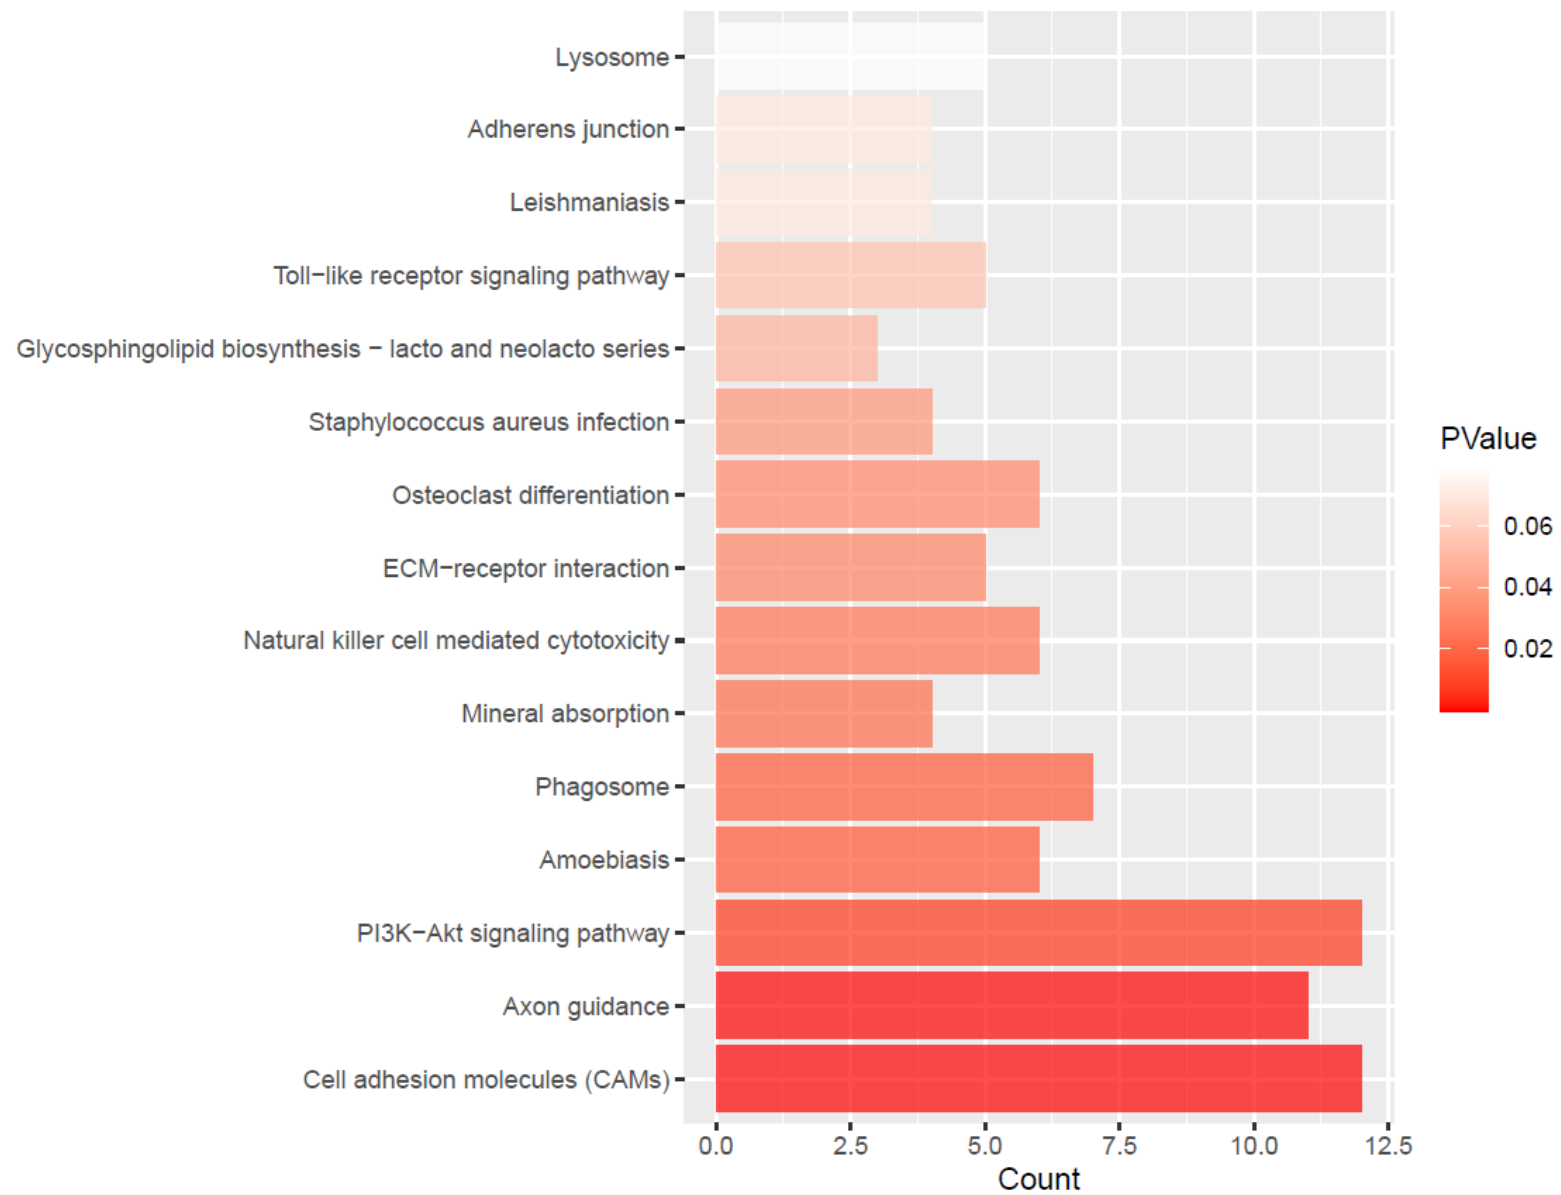

Figure S7



**Cell surface glycoprotein MUC18 (MCAM)**

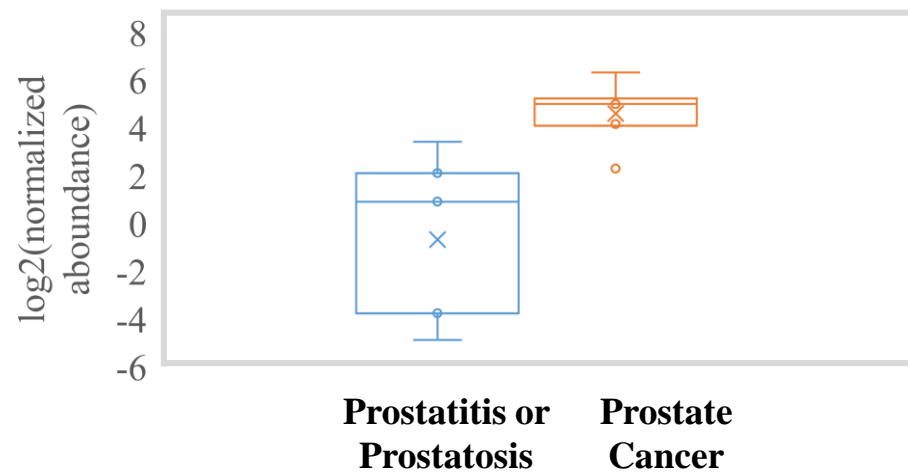

**Immunoglobulin superfamily member 8 (IGSF8)**

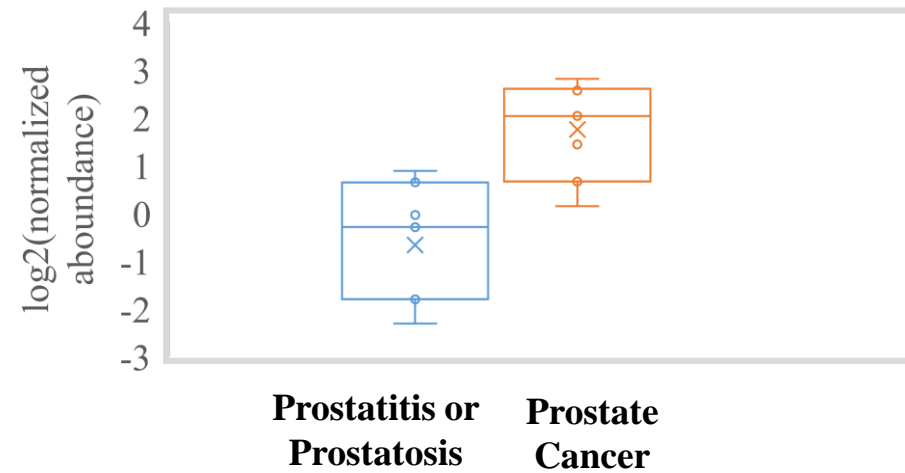

**Galectin-3 (LGALS3)**

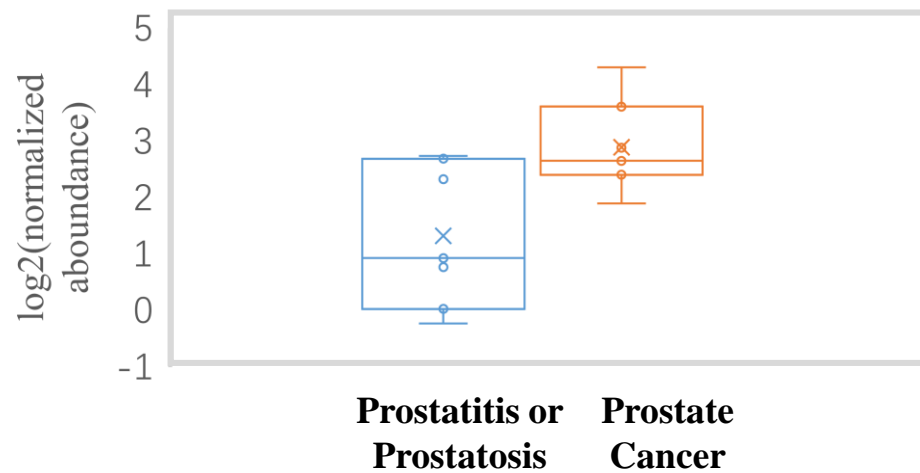

**Endoglin (ENG)**

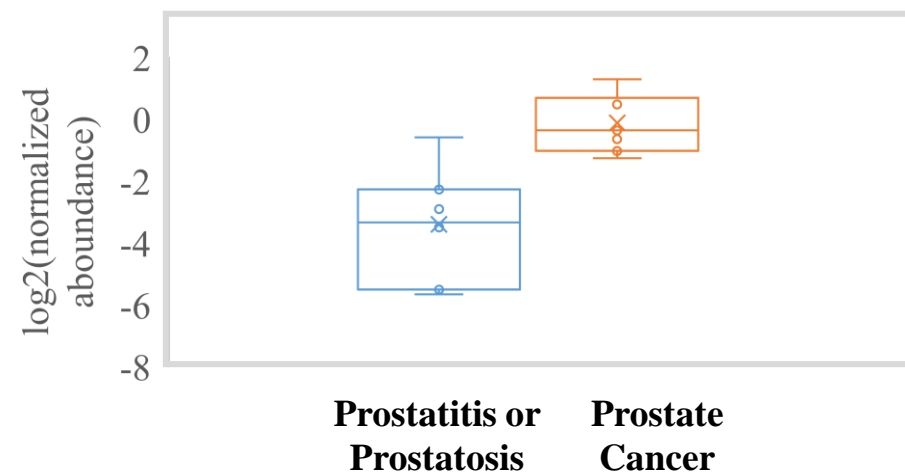

Figure S8

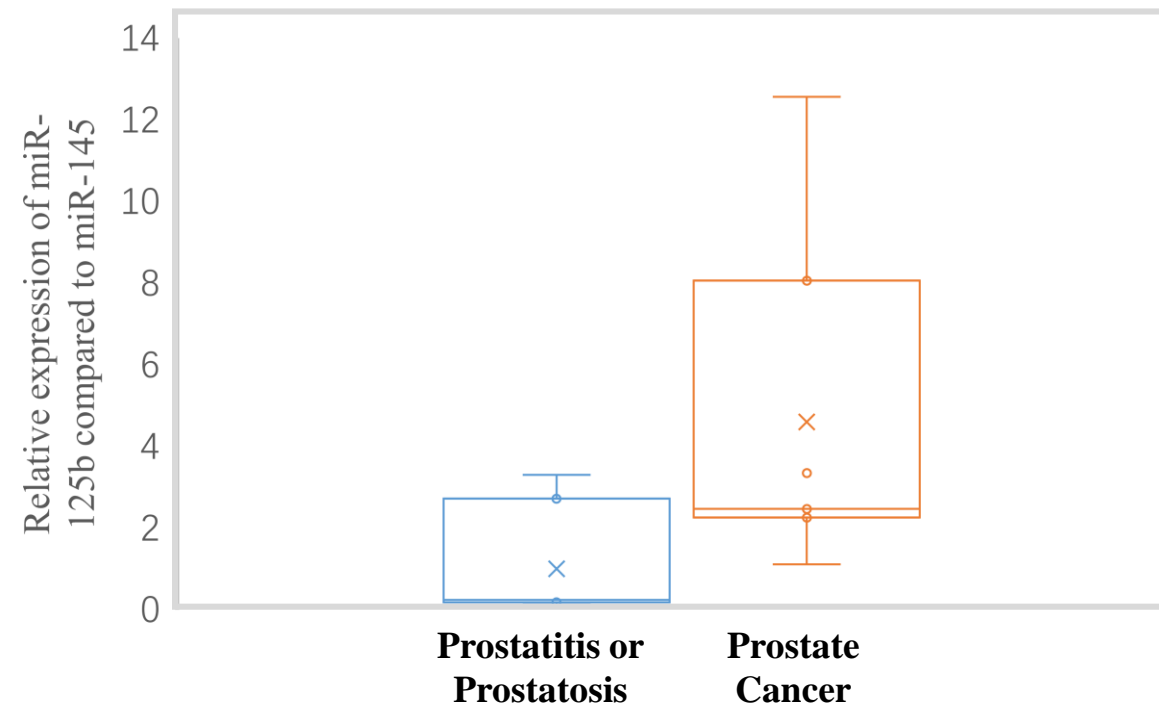

Figure S9
